# Supplementary material
Source: PubMed Central journal article supplement (PMC1253551)

**Growth**  
(arbitrary units)

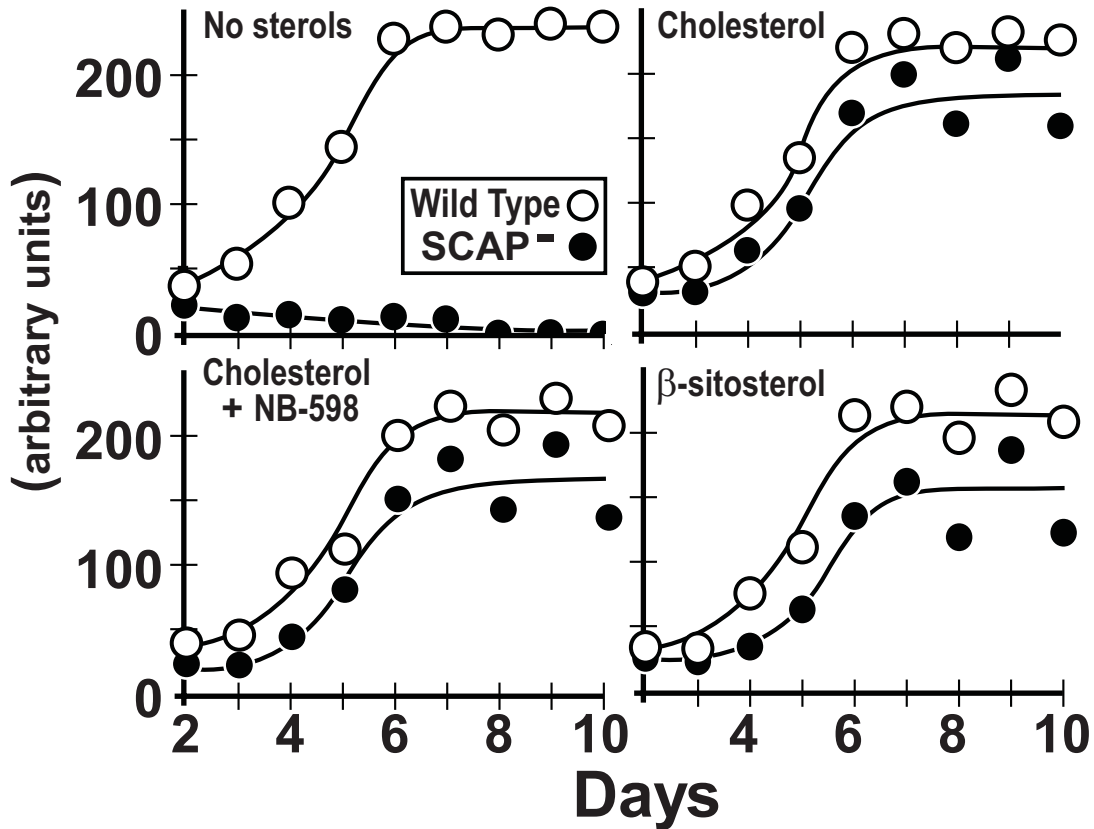

Supplement: pnas_0503590102_2.pdf [file pnas_0503590102_2.pdf]

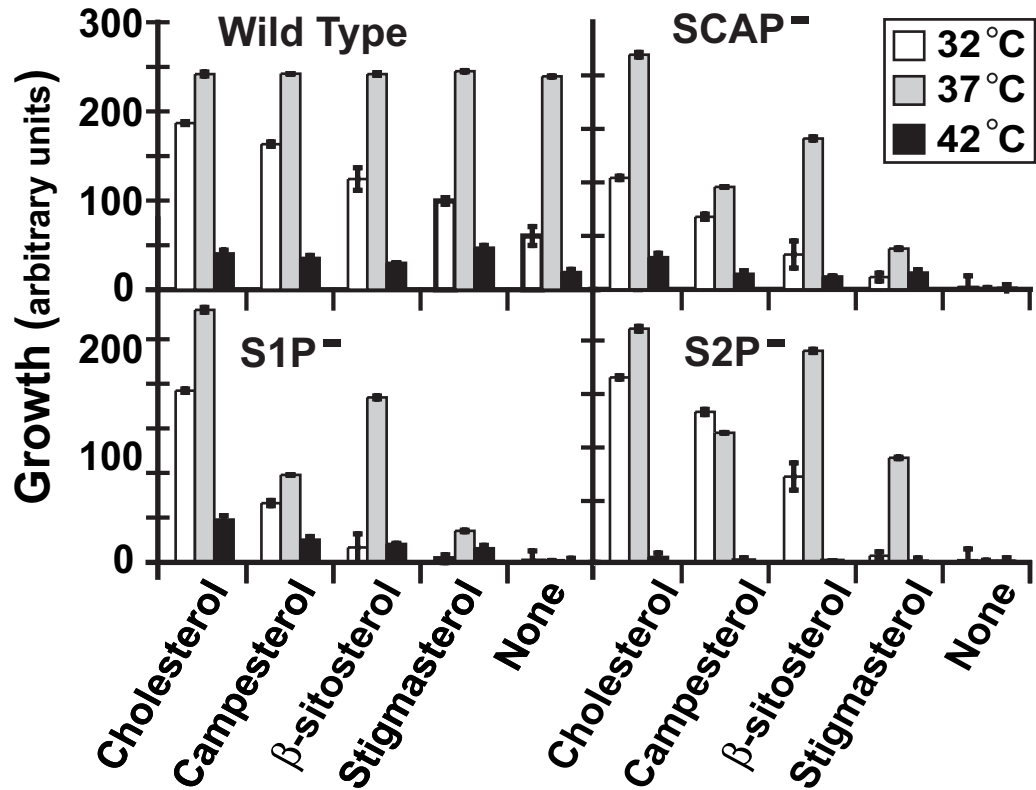

Supplement: pnas_0503590102_3.pdf [file pnas_0503590102_3.pdf]
